# Supplementary material for: The hyperthermophilic partners Nanoarchaeum and Ignicoccus stabilize their tRNA T-loops via different but structurally equivalent modifications
Source: PubMed Central journal article supplement — Nucleic Acids Res. 2020 May 27;48(12):6906–18. doi: 10.1093/nar/gkaa411 (PMC7337903; doi:10.1093/nar/gkaa411), 2020-05-27
Supplement: gkaa411_supplemental_file.pdf [file gkaa411_supplemental_file.pdf]

## Supplementary Material

# The hyperthermophilic partners *Nanoarchaeum* and *Ignicoccus* stabilize their tRNA T-loops via different but structurally equivalent modifications

Simon Rose,<sup>1</sup> Sylvie Auxilien,<sup>2</sup> Jesper F. Havelund,<sup>1</sup> Finn Kirpekar,<sup>1</sup>

Harald Huber,<sup>3</sup> Henri Grosjean,<sup>2</sup> & Stephen Douthwaite<sup>1</sup>

<sup>1</sup> Department of Biochemistry & Molecular Biology, University of Southern Denmark, Campusvej 55, DK-5230 Odense M, Denmark.

<sup>2</sup> Université Paris-Saclay, CEA, CNRS, Institute for Integrative Biology of the Cell (I2BC), 91198, Gif-sur-Yvette, France.

<sup>3</sup> Lehrstuhl für Mikrobiologie und Archaeenzentrum, Universität Regensburg, Universitätsstraße 31, D-93053 Regensburg, Germany.

**Supplementary Table S1.** Matching the experimentally determined mass data for compound #6 with putative atomic compositions.

| <b>Formula</b>                                                 | <b>Score</b> | <b>Difference (ppm)</b> |
|----------------------------------------------------------------|--------------|-------------------------|
| C <sub>10</sub> N <sub>2</sub> O <sub>5</sub> SH <sub>14</sub> | 98.70        | 2.01                    |
| C <sub>11</sub> N <sub>6</sub> OSH <sub>10</sub>               | 96.65        | -2.50                   |
| C <sub>11</sub> N <sub>2</sub> S <sub>3</sub> H <sub>18</sub>  | 86.06        | -0.64                   |
| C <sub>8</sub> N <sub>5</sub> O <sub>4</sub> SH <sub>12</sub>  | 85.45        | 7.29                    |
| C <sub>13</sub> N <sub>3</sub> O <sub>2</sub> SH <sub>12</sub> | 83.25        | -7.74                   |

The software *Masshunter* (Agilent) was used to calculate the most plausible formula for compound #6 based on its neutral mass and isotope distribution. Sulphur has a measurable proportion of the <sup>34</sup>S isotope generating a characteristic M+2 signal (Figure S4), and is thus present in each of the five top scoring putative formulas for the compound. The formula for m<sup>1</sup>s<sup>4</sup>Ψ (C<sub>10</sub>N<sub>2</sub>O<sub>5</sub>SH<sub>14</sub>) has the highest score, and is the only atomic composition compatible with a nucleoside. The differences (in ppm) are shown between the measured mass of compound #6 and the theoretical masses of the putative compounds. The same composition analyses also fit for compound #7 (m<sup>5</sup>s<sup>2</sup>U) and compound #8 (s<sup>2</sup>Um).

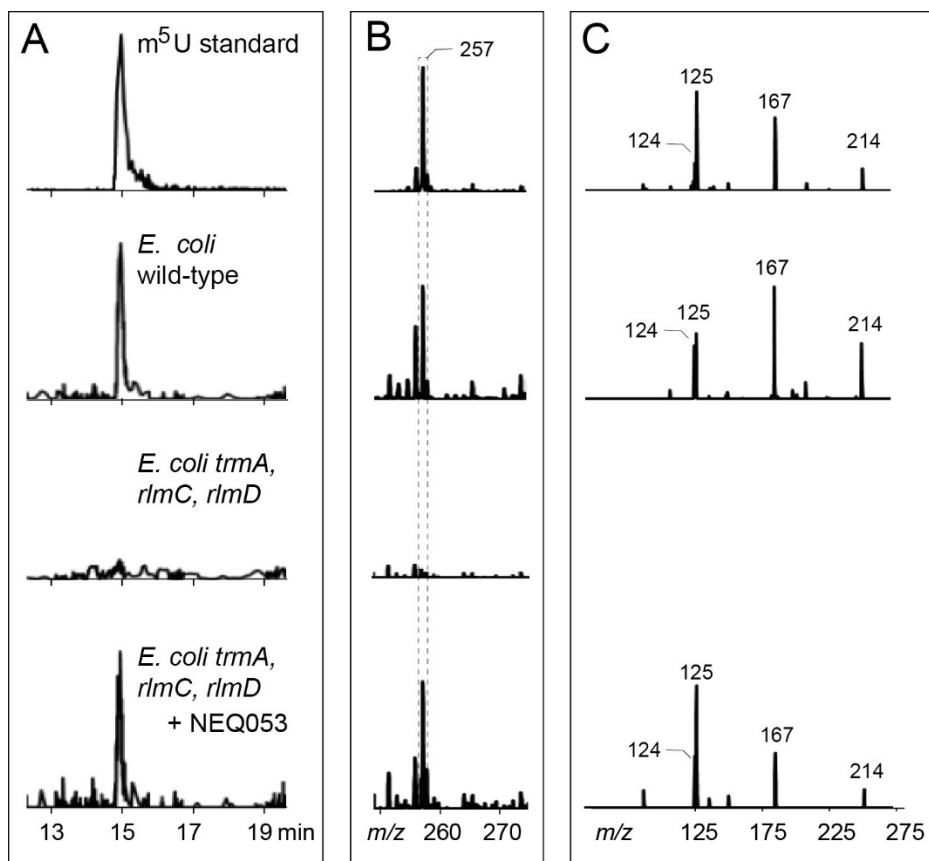

**Supplementary Figure S1: Expression of NEQ053 *in vivo* in *E. coli*.** (A) Nucleoside separation by LC on a Phenomenex Luna C18 column of showing the fractions eluting around 15 min. Elution profiles show (from the top down): a chemically synthesized *m*<sup>5</sup>U standard; total nucleosides from digestion of wild-type *E. coli* tRNAs; nucleosides from digestion of total tRNAs from the *E. coli trmA, rlmC, rlmD* null-strain; and nucleosides from digestion of total tRNAs from the *E. coli trmA, rlmC, rlmD* null-strain complemented with NEQ053. (B) ESI-MS spectra of the corresponding LC fractions at 15 min run in negative ion mode on with ion-trap selection of the *m/z* 257 peak. For the null-mutant, no signal above background was registered. (C) Collision-induced fragmentation of *m*<sup>5</sup>U in negative ion mode. Breaking the uracil base results in loss of NHCO comprising *N3* and the *C2* carbonyl group, seen as the *m/z* 214.07 fragment. Opening of the sugar and loss of C<sub>3</sub>H<sub>6</sub>O<sub>3</sub> (with the base remaining intact and retaining the ribose *C1'* and *C2'-O*) results in the *m/z* 167.05 fragment, and loss of the entire ribose is seen in the *m/z* 125.05 fragment. The adjacent peak at *m/z* 124.04 has lost NHCO from the base and C<sub>3</sub>H<sub>6</sub>O<sub>3</sub> from ribose, while retaining the *C5* methyl group. The *m/z* 124 and 167 fragments were isolated and their compositions confirmed by further fragmentation into smaller structures including those obtained using an alternative MS approach (Figure 3).

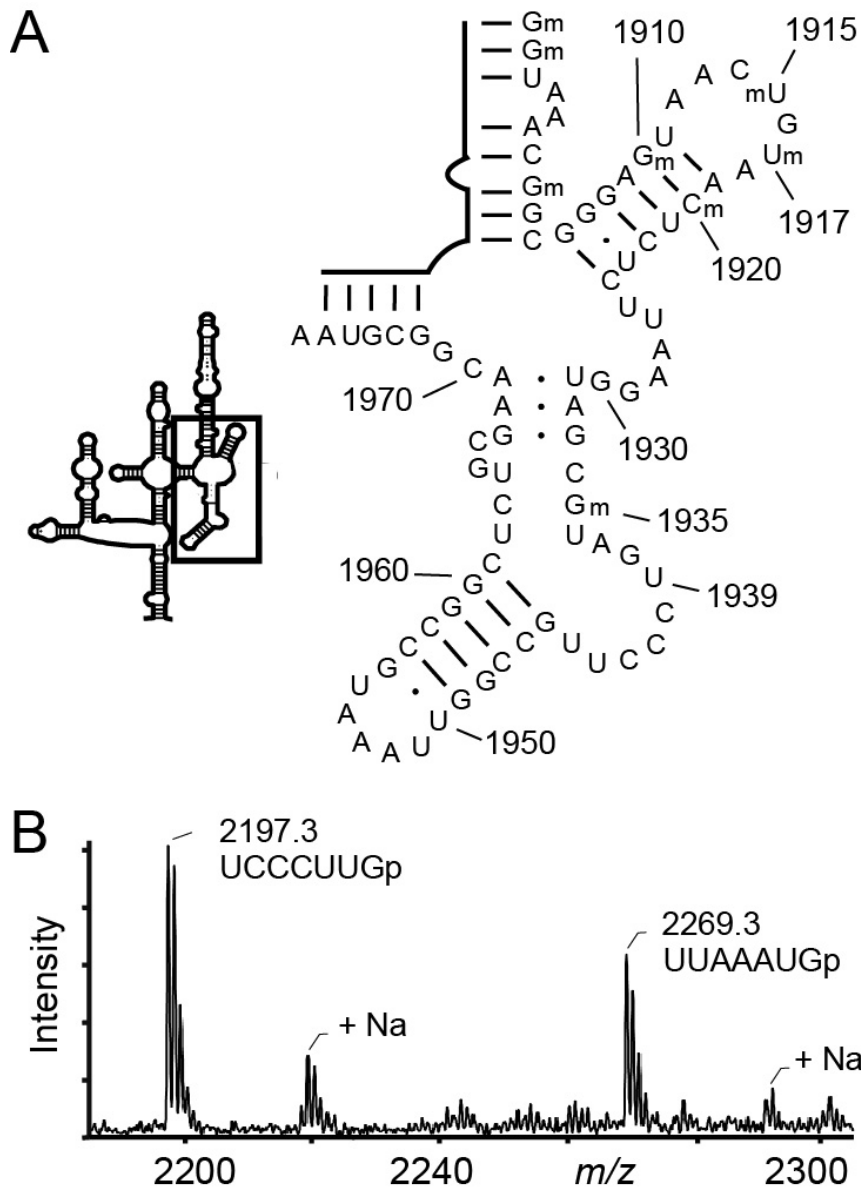

**Supplementary Figure S2: Nucleotide modifications in *N. equitans* 23S rRNA.** (A) Structure of the U1939 region in *N. equitans* 23S rRNA, where eight nucleotides in this region were shown by MS and primer extension to be 2'-*O*-methylated *in vivo* (at the sites indicated). (B) Partial MALDI spectrum of authentic 23S rRNA isolated from *N. equitans* cells and digested with RNase T1. The UCCCUUGp fragment at  $m/z$  2197 (nucleotides 1934-1940) shows that there is no methylation *in vivo* at U1939 in *N. equitans*. The UUAAAUGp fragment stems from the adjacent sequence 1950-1955. Adducts of these fragments with sodium (+Na) are 22.0 Da greater in mass. Comparable analyses of the *N. equitans* 23S rRNA regions around nucleotide U747 (not shown) also revealed an absence of any  $m^5U$  modification (and a lack of 2'-*O*-methylation).

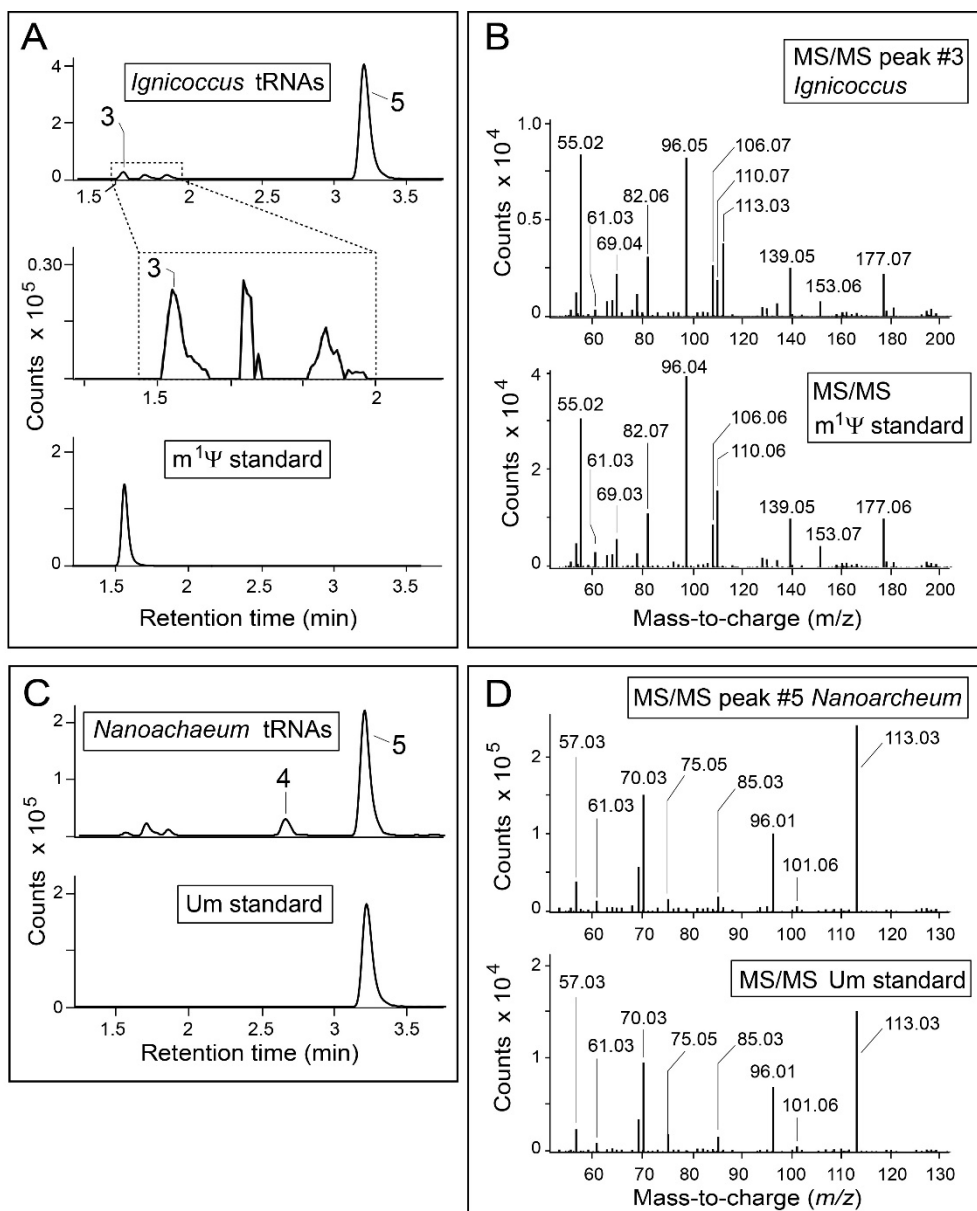

**Supplementary Figure S3:** Tandem MS fragmentation analyses of compounds #3 and #5. **(A)** Expansion of the region around 1.5 minute in the *I. hospitalis* nucleoside LC profile (Figure 3), and **(B)** fragmentation analysis of compound #3 in positive ion mode compared to a  $m^1\Psi$  standard. **(C)** *N. equitans* nucleosides (Figure 3) and **(D)** fragmentation of compound #5 in positive ion mode compared to a Um standard.

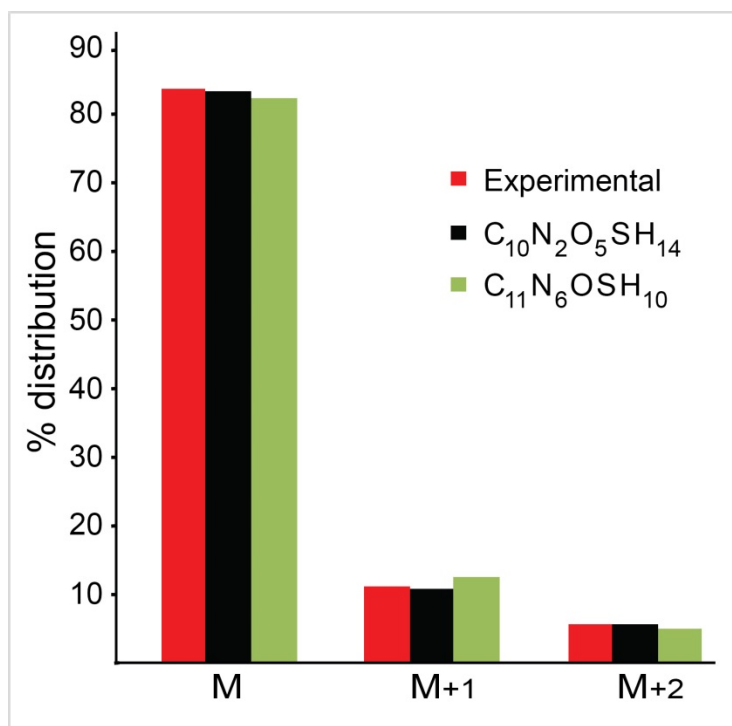

**Supplementary Figure S4: Application of accurate mass determination and isotopic patterns to elucidate a compound's formula.** The calculated isotopic patterns of the two highest scoring formulas from Table S1 are compared to the experimentally determined spectral pattern for compound #6. The theoretical pattern for the formula C<sub>10</sub>N<sub>2</sub>O<sub>5</sub>SH<sub>14</sub> comes closest to that obtained experimentally, and fits with the composition of a ribonucleoside. M is the monoisotopic signal; M+1 and M+2 result from the natural isotope distributions of the elements listed.

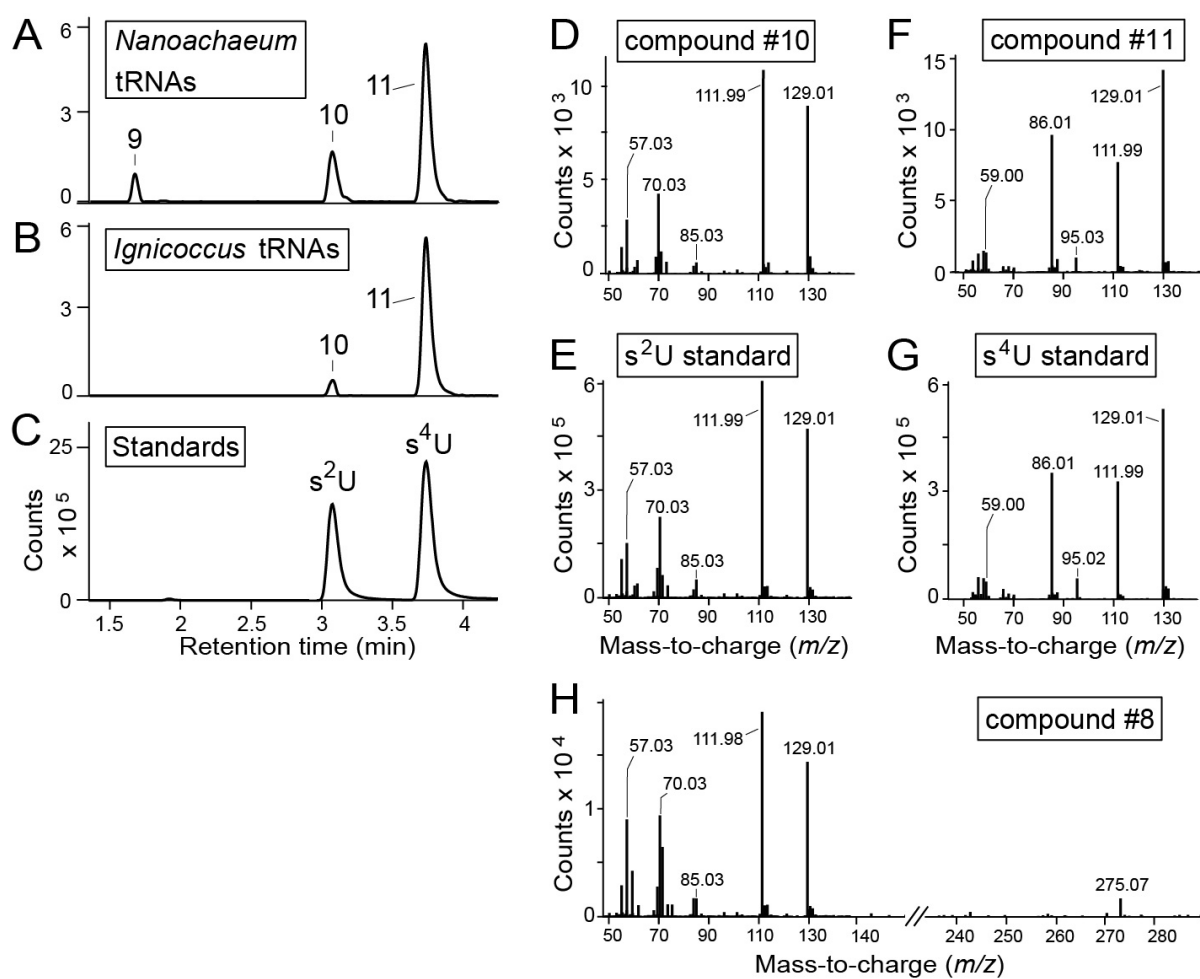

**Supplementary Figure S5:** Nucleosides registered at  $m/z$  261.05 in positive ion mode correspond to thiolated uridine. Chromatogram profiles from (A) *N. equitans* and (B) *I. hospitalis* tRNA nucleosides compared to (C) a mixture of  $s^2U$  and  $s^4U$  standards. (D) MS/MS fragmentation in positive ion mode of compound #10 from the *N. equitans* eluents and (E) the  $s^2U$  standard show release of a thiolated uracil base (at  $m/z$  129.01), loss of  $NH_3$  (at  $m/z$  111.99) and a series of smaller fragments indicative of  $s^2U$ . The MS/MS fragmentation in positive ion mode of (F) *N. equitans* compound #11 and (G) the  $s^4U$  standard also show release of the thiolated uracil base loss of  $NH_3$  (at  $m/z$  111.99) followed by a distinctly different set of smaller fragments indicative of  $s^4U$ . (H) Analyses of the *I. hospitalis* compound #8 at  $m/z$  275.07 with the loss of a methylated ribose to leave the  $m/z$  129.01 thiolated nucleobase, which showed a fragmentation pattern identical to  $s^2U$ . This confirmed that compound #8 is  $s^2Um$ . The analysis of compound #9 is shown in Supplementary Figure S6.

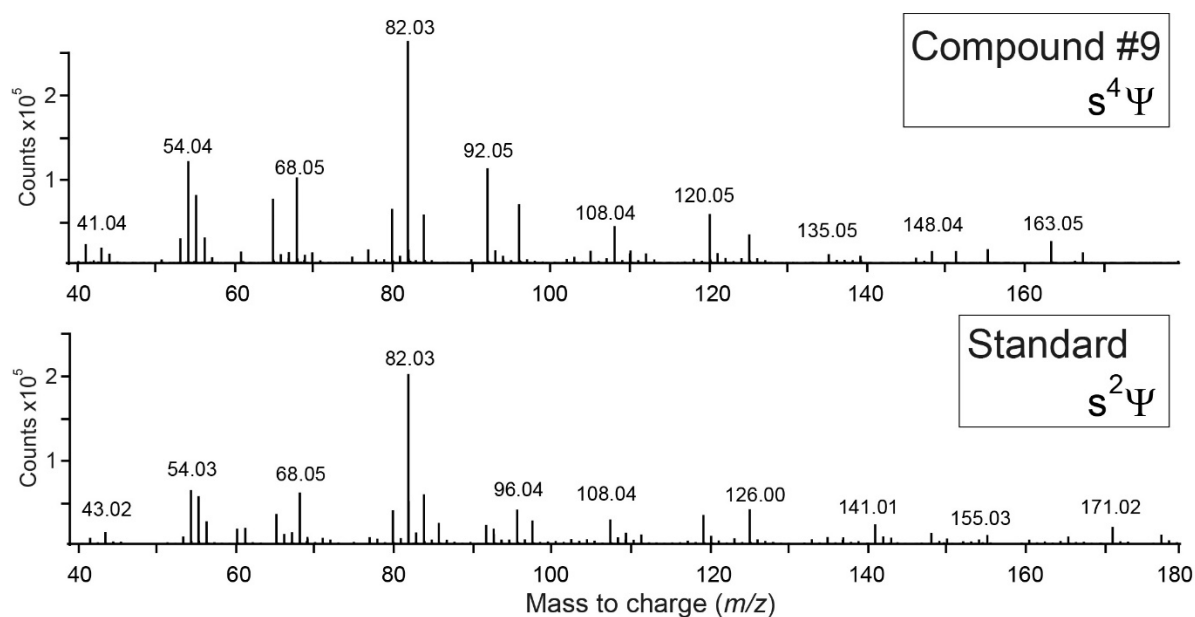

**Supplementary Figure S6:** Tandem MS spectra of nucleoside compound #9 in positive ion mode, comparing its fragmentation pattern with the  $s^2\Psi$  standard. The two compounds have stable a glycosidic bond, consistent with derivatives of pseudouridine; they have the same mass, identical with thiolated (pseudo)uridine. However, despite being closely related, their fragmentation patterns show that they are not identical, and fragmentation of compound #9 in negative ion mode (as in Figure 5) indicates that is most likely  $s^4\Psi$ .
